# Supplementary material
Source: PubMed Central journal article supplement (PMC9582968)
Supplement: jamapsychiatry-e223384-s001.pdf [file jamapsychiatry-e223384-s001.pdf]

## Supplemental Online Content

Ritter C, Buchmann A, Müller ST, et al. Evaluation of prefrontal  $\gamma$ -aminobutyric acid and glutamate levels in individuals with major depressive disorder using proton magnetic resonance spectroscopy. *JAMA Psychiatry*. Published online October 19, 2022. doi:10.1001/jamapsychiatry.2022.3384

**eMethods 1.** Study Procedures

**eMethods 2.** MRI Data Acquisition and Analyses

**eResults 1.** Comorbidity Analyses

**eResults 2.** ANCOVA Correcting for Gray Matter Ratio, Age, and Sex

**eResults 3.** Analyses in Female and Male Groups

**eResults 4.** Exploratory Factor Analysis of BDI Items

**eFigure 1.** Female Subgroup Boxplots

**eFigure 2.** Male Subgroup Boxplots

**eReferences.**

This supplementary material has been provided by the authors to give readers additional information about their work.

## **eMethods 1. Study Procedures**

The prescreening procedure, conducted via telephone after receiving verbal consent from the participant, included a safety screening for magnetic resonance imaging (MRI), as well as the screening part of the structural clinical interview for DSM disorders (SCID-IV). Subsequently, participants completed an online battery of psychological and physiological questionnaires. Following this telephone screening, an approximately five-hour long face-to-face session was conducted at the Children's Hospital Zürich, at the start of which participants gave written consent and which included interviews of psychological rating scales conducted by a trained psychologist, such as the full SCID-IV interview.<sup>1</sup> This session also included assessments using the Hamilton Depression Rating Scale (HAM-D),<sup>2</sup> the Montgomery-Åsberg Depression Rating Scale (MADRS),<sup>3</sup> and Beck's Depression Inventory (BDI).<sup>4</sup> Finally, blood samples were collected, and participants underwent MRI scanning, including magnetic resonance spectroscopy (MRS).

## **eMethods 2.** MRI Data Acquisition and Analyses

Measurements included a localizer and a 3D T1-weighted spoiled gradient recalled sequence for the assessment of global and local brain volumes (162 slices of 256x256 voxels, 1x1x1 mm resolution; TR=11 ms, TE=5 ms, TI = 600 ms, flip angle 8°), used for the localization of the MR spectra. The centre of the spectrum was localised by a standardised set of measurements,<sup>5,6</sup> on a slice 1 mm above the superior margin of the lateral ventricles. On this slice, the length of the midline was measured, and the width of the left hemisphere was calculated at a point 1/3 of the distance from the anterior margin of the brain, along the midline. The midpoint of a perpendicular line crossing from the midline to the lateral margin of the left hemisphere was used to define the voxel center (see Figure 1A and B for a picture of the voxel and the spectra respectively). Editing pulses were applied at 1.9 and 7.5 ppm. Since the GABA findings were not separated from the co-edited macromolecular peak at 3 ppm, the results refer to GABA+ rather than pure GABA. The MRS spectra were processed with the LCModel 6.3-1 H, using a simulated basis set. Spectra were inspected visually for artefacts, and CRLB cutoffs for GABA, Glu, and Gln were set at 20 %, 20 %, and 30 % respectively, resulting in n=372, 372, 248, and 373 datasets for GABA, Glu, Gln, and Glx, passing the quality criteria. Linewidth data from LCModel were used as an additional index of spectral quality. Metabolite levels were referenced to the unsuppressed water peak and derived in institutional units after correction for atrophy and differing water concentrations within the brain and CSF compartments.<sup>5</sup> We also adjusted for grey matter fraction in all correlation analyses to minimise any confounds from differences in tissue composition, and there were no significant between-group differences of grey matter fraction for any of the MDD diagnosis groups ( $\chi^2=2.52$ ,  $p=.283$ ). There was, however, a trend-level

difference between the sexes ( $\chi^2=3.54$ ,  $p=.06$ ,  $\bar{x}_{\text{Female}(n)}=.325(250)$ ,  
 $\bar{x}_{\text{Male}(n)}=.316(136)$ ).

## eResults 1. Comorbidity Analyses

Results of metabolite differences between the depression groups remained unchanged with the introduction of the diagnosis of anxiety disorders, OCD, PTSD, and eating disorders as covariates in a ANCOVA for Glu ( $F(2,368)=3.3$ ,  $p=.028$ ), with significantly lower Glu concentrations in the past MDD group (Cohen's  $d=.365$ ,  $p=.008$ , mean difference Healthy-Past<sub>(SEM)</sub>=.349(.130)), and for GABA ( $F(2,369)=6.233$ ,  $p=.002$ ), with significantly lower concentrations in the past (Cohen's  $d=.458$ ,  $p<.001$ , mean difference Healthy-Past<sub>(SEM)</sub>=.225(.067)), as well as current MDD groups (Cohen's  $d=.353$ ,  $p=.042$ , mean difference Healthy-Current<sub>(SEM)</sub>=.173(.085)). There were no significant between group differences for Glx. The effect for Gln diminished to trend-level with the introduction of anxiety disorders as a covariate ( $F(2,244)=2.772$ ,  $p=.065$ ), but remained significant when anxiety disorders were not included, even if the other disorders were included as covariates ( $F(2,244)=4.359$ ,  $p=.014$ ), in which case the results showed significantly higher Gln concentrations in the past MDD group (Cohen's  $d=-.406$ ,  $p=.009$ , mean difference Healthy-Past<sub>(SEM)</sub>=-.209(.079)), as well as the current MDD group (Cohen's  $d=-.416$ ,  $p=.050$ , mean difference Healthy-Current<sub>(SEM)</sub>=-.214 (.109)) when compared to the healthy controls.

Exclusion of  $n=10$  subjects who took psychoactive medication during testing did not change the results of the between-group analyses. GABA concentrations were significantly lower in the past ( $r=.184$ ,  $p=.003$ ,  $\bar{x}_{\text{Healthy}}(\text{SEM}, n)=2.70(.03, 232)$ ,  $\bar{x}_{\text{Past MDD}}(\text{SEM}, n)=2.48(.05, 88)$ , adjusted for FDR) as well as the current MDD group ( $r=.172$ ,  $p=.008$ ,  $\bar{x}_{\text{Healthy}}(\text{SEM}, n)=2.70(.03, 232)$ ,  $\bar{x}_{\text{Current MDD}}(\text{SEM}, n)=2.47(.07, 34)$ , adjusted for FDR) when compared to healthy controls, while Glu concentrations were significantly lowered in the past MDD group ( $r=.163$ ,  $p=.010$ ,  $\bar{x}_{\text{Healthy}}(\text{SEM}, n)=7.52(.06, 230)$ ,  $\bar{x}_{\text{Past}}$

$\bar{MDD}_{(SEM, n)} = 7.23(.11, 89)$ , adjusted for FDR). Gln concentration was significantly higher in the past MDD group ( $r = .165$ ,  $p = .043$ ,  $\bar{X}_{Healthy(SEM, n)} = 1.64(.04, 149)$ ,  $\bar{X}_{Past MDD(SEM, n)} = 1.85(.08, 64)$ , adjusted for FDR).

## **eResults 2.** ANCOVA Correcting for Gray Matter Ratio, Age, and Sex

In additional ANCOVA analyses with post-hoc pairwise comparisons covarying for grey matter ratio, age, and sex, and for multiple testing using Bonferroni correction we found that the results for the comparison of GABA concentrations between the healthy control group and the past MDD group stayed significant (Cohen's  $d=.436$ ,  $p_{\text{bonferroni}}=.002$ , mean difference<sub>Healthy-Past MDD</sub>=.216,  $n_{\text{Healthy;Past MDD}}=234,93$ ), while the comparison between healthy controls and current MDD group was reduced to nonsignificance (Cohen's  $d=.299$ ,  $p_{\text{bonferroni}}=.221$ , mean difference<sub>Healthy-Current MDD</sub>=.148,  $n_{\text{Healthy;Past MDD}}=236,44$ ). See tables 1a and 1b for an overview.

For the other metabolites, the analyses mirrored those described in the manuscript, with no effects found for Glx, significantly lower Glu concentrations in the past MDD group when compared to the control group (Cohen's  $d=.309$ ,  $p_{\text{bonferroni}}=.045$ , mean difference<sub>Healthy-past MDD</sub>=.292,  $n_{\text{Healthy;Past MDD}}=236,92$ ), and significantly higher Gln concentrations in the past MDD group when compared to the healthy controls (Cohen's  $d=-.406$ ,  $p_{\text{bonferroni}}=.027$ , mean difference<sub>Healthy-past MDD</sub>=-.205,  $n_{\text{Healthy;Past MDD}}=153,66$ ). See tables 2a and 2b, 3a and 3b, and 4a and 4b respectively.

Table 1. GABA Concentrations

| Table 1a: ANCOVA - GABA Concentrations |  |                |  |     |             |         |       |          |  |
|----------------------------------------|--|----------------|--|-----|-------------|---------|-------|----------|--|
|                                        |  | Sum of Squares |  | df  | Mean Square | F       | p     | $\eta^2$ |  |
| Overall model                          |  | 3.22296        |  | 5   | 0.64459     | 2.70796 | 0.020 |          |  |
| MDD Diagnosis                          |  | 3.19435        |  | 2   | 1.59717     | 6.54229 | 0.002 | 0.035    |  |
| Grey Matter Ratio                      |  | 0.00202        |  | 1   | 0.00202     | 0.00829 | 0.927 | 0.000    |  |
| Age                                    |  | 0.00701        |  | 1   | 0.00701     | 0.02871 | 0.866 | 0.000    |  |
| Sex                                    |  | 0.01958        |  | 1   | 0.01958     | 0.08019 | 0.777 | 0.000    |  |
| Residuals                              |  | 87.15467       |  | 357 | 0.24413     |         |       |          |  |

| Table 1b: Post Hoc Comparisons – GABA Concentrations by MDD Diagnosis |   |               |                 |        |     |       |                         |           |  |
|-----------------------------------------------------------------------|---|---------------|-----------------|--------|-----|-------|-------------------------|-----------|--|
| Comparison                                                            |   |               |                 |        |     |       |                         |           |  |
| MDD Diagnosis                                                         |   | MDD Diagnosis | Mean Difference | SE     | df  | t     | $p_{\text{bonferroni}}$ | Cohen's d |  |
| Healthy                                                               | - | Past MDD      | 0.2156          | 0.0626 | 357 | 3.445 | 0.002                   | 0.436     |  |
|                                                                       | - | Current MDD   | 0.1476          | 0.0823 | 357 | 1.794 | 0.221                   | 0.299     |  |
| Past MDD                                                              | - | Current MDD   | -0.0680         | 0.0925 | 357 | 0.735 | 1.000                   | -0.138    |  |

Note. Comparisons are based on estimated marginal means, corrected for multiple comparisons using the Bonferroni method.



Table 2. Glx Concentrations

| Table 2a: ANCOVA - Glx Concentration |                |     |             |         |       |          |  |  |  |
|--------------------------------------|----------------|-----|-------------|---------|-------|----------|--|--|--|
|                                      | Sum of Squares | df  | Mean Square | F       | p     | $\eta^2$ |  |  |  |
| Overall model                        | 15.9837        | 5   | 3.1967      | 2.7613  | 0.018 |          |  |  |  |
| MDD Diagnosis                        | 1.6879         | 2   | 0.8439      | 0.7245  | 0.485 | 0.004    |  |  |  |
| Grey Matter Ratio                    | 12.5938        | 1   | 12.5938     | 10.8118 | 0.001 | 0.029    |  |  |  |
| Age                                  | 0.0561         | 1   | 0.0561      | 0.0481  | 0.826 | 0.000    |  |  |  |
| Sex                                  | 1.6459         | 1   | 1.6459      | 1.4130  | 0.235 | 0.004    |  |  |  |
| Residuals                            | 417.0066       | 358 | 1.1648      |         |       |          |  |  |  |

| Table 2b: Post Hoc Comparisons – Glx Concentrations by MDD Diagnosis |   |               |                 |       |     |         |                         |           |  |
|----------------------------------------------------------------------|---|---------------|-----------------|-------|-----|---------|-------------------------|-----------|--|
| Comparison                                                           |   |               | Mean Difference | SE    | df  | t       | p <sub>bonferroni</sub> | Cohen's d |  |
| MDD Diagnosis                                                        |   | MDD Diagnosis |                 |       |     |         |                         |           |  |
| Healthy                                                              | - | Past MDD      | 0.16157         | 0.136 | 358 | 1.1859  | 0.709                   | 0.14971   |  |
|                                                                      | - | Current MDD   | 0.00813         | 0.180 | 358 | 0.0452  | 1.000                   | 0.00753   |  |
| Past MDD                                                             | - | Current MDD   | -0.15344        | 0.202 | 358 | -0.7610 | 1.000                   | -0.14217  |  |

Note. Comparisons are based on estimated marginal means, corrected for multiple comparisons using the Bonferroni method.

Table 3. Glu Concentrations

| Table 3a: ANCOVA - Glu Concentration |  |                |     |             |        |       |          |  |  |
|--------------------------------------|--|----------------|-----|-------------|--------|-------|----------|--|--|
|                                      |  | Sum of Squares | df  | Mean Square | F      | p     | $\eta^2$ |  |  |
| Overall model                        |  | 13.4874        | 5   | 2.6975      | 3.2373 | 0.007 |          |  |  |
| MDD Diagnosis                        |  | 5.3219         | 2   | 2.6609      | 2.9819 | 0.052 | 0.016    |  |  |
| Grey Matter Ratio                    |  | 5.6171         | 1   | 5.6171      | 6.2946 | 0.013 | 0.017    |  |  |
| Age                                  |  | 2.4902         | 1   | 2.4902      | 2.7906 | 0.096 | 0.008    |  |  |
| Sex                                  |  | 0.0583         | 1   | 0.0583      | 0.0653 | 0.798 | 0.000    |  |  |
| Residuals                            |  | 317.6829       | 356 | 0.8924      |        |       |          |  |  |

| Table 3b: Post Hoc Comparisons – Glu Concentrations by MDD Diagnosis |   |               |                 |       |     |       |                         |           |  |
|----------------------------------------------------------------------|---|---------------|-----------------|-------|-----|-------|-------------------------|-----------|--|
| Comparison                                                           |   |               |                 |       |     |       |                         |           |  |
| MDD Diagnosis                                                        |   | MDD Diagnosis | Mean Difference | SE    | df  | t     | p <sub>bonferroni</sub> | Cohen's d |  |
| Healthy                                                              | - | Past MDD      | 0.2915          | 0.119 | 356 | 2.442 | 0.045                   | 0.3086    |  |
|                                                                      | - | Current MDD   | 0.0762          | 0.157 | 356 | 0.484 | 1.000                   | 0.0806    |  |
| Past MDD                                                             | - | Current MDD   | -0.2154         | 0.176 | 356 | 1.220 | 0.670                   | -0.2280   |  |

Note. Comparisons are based on estimated marginal means, corrected for multiple comparisons using the Bonferroni method.

Table 4. Gln Concentrations

| Table 4a: ANCOVA - Gln Concentration |  |                |  |     |             |        |       |  |          |  |
|--------------------------------------|--|----------------|--|-----|-------------|--------|-------|--|----------|--|
|                                      |  | Sum of Squares |  | df  | Mean Square | F      | p     |  | $\eta^2$ |  |
| Overall model                        |  | 5.284          |  | 5   | 1.057       | 3.998  | 0.002 |  |          |  |
| MDD Diagnosis                        |  | 2.186          |  | 2   | 1.093       | 4.300  | 0.015 |  | 0.034    |  |
| Grey Matter Ratio                    |  | 0.217          |  | 1   | 0.217       | 0.855  | 0.356 |  | 0.003    |  |
| Age                                  |  | 2.761          |  | 1   | 2.761       | 10.865 | 0.001 |  | 0.043    |  |
| Sex                                  |  | 0.120          |  | 1   | 0.120       | 0.471  | 0.493 |  | 0.002    |  |
| Residuals                            |  | 59.477         |  | 234 | 0.254       |        |       |  |          |  |

| Table 4b: Post Hoc Comparisons – Gln Concentrations by MDD Diagnosis |   |               |                 |        |     |        |                         |           |  |  |
|----------------------------------------------------------------------|---|---------------|-----------------|--------|-----|--------|-------------------------|-----------|--|--|
| Comparison                                                           |   |               |                 |        |     |        |                         |           |  |  |
| MDD Diagnosis                                                        |   | MDD Diagnosis | Mean Difference | SE     | df  | t      | p <sub>bonferroni</sub> | Cohen's d |  |  |
| Healthy                                                              | - | Past MDD      | -0.2046         | 0.0777 | 234 | -2.632 | 0.027                   | -0.4057   |  |  |
|                                                                      | - | Current MDD   | -0.1926         | 0.1057 | 234 | -1.822 | 0.209                   | -0.3820   |  |  |
| Past MDD                                                             | - | Current MDD   | 0.0119          | 0.1172 | 234 | 0.102  | 1.000                   | 0.0237    |  |  |

Note. Comparisons are based on estimated marginal means, corrected for multiple comparisons using the Bonferroni method.

### **eResults 3.** Analyses in Female and Male Groups

Within the female subgroup, we observed significantly lower GABA concentration in subjects with past MDD when compared to healthy controls ( $r=.173$ ,  $p=.033$ ,  $\bar{x}_{\text{Healthy(SEM,n)}}=2.68(.04, 153)$ ,  $\bar{x}_{\text{Past MDD(SEM,n)}}=2.49(.05, 75)$ , adjusted for FDR). Likewise, Glu concentrations were significantly lower in the past MDD group when compared to the control group ( $r=.187$ ,  $p=.019$ ,  $\bar{x}_{\text{Healthy(SEM,n)}}=7.52(.08, 153)$ ,  $\bar{x}_{\text{Past MDD(SEM,n)}}=7.16(.12, 75)$ , adjusted for FDR). Analyses left DLPFC Gln concentrations revealed significantly higher levels in subjects with past MDD when compared to healthy controls ( $r=.258$ ,  $p=.009$ ,  $\bar{x}_{\text{Healthy(SEM,n)}}=1.63(.05, 153)$ ,  $\bar{x}_{\text{Past MDD(SEM,n)}}=1.92(.09, 75)$ , adjusted for FDR).

Between-group analyses in the male subgroup revealed significantly lower GABA concentrations in subjects with past MDD when compared to healthy controls ( $r=.189$ ,  $p=.046$ ,  $\bar{x}_{\text{Healthy(SEM,n)}}=2.73(.06, 98)$ ,  $\bar{x}_{\text{Past MDD(SEM,n)}}=2.48(.13, 23)$ ). The result in the male subgroup diminished to non-significant levels when adjusted for FDR, although the effect size was similar to that seen in the (larger) female subgroup.

In the male subgroup, we found significant associations between GABA levels and MADRS ( $\rho=-.252$ ,  $p=.005$ ,  $n=124$ ), BDI ( $\rho=-.261$ ,  $p=.004$ ,  $n=122$ ).

#### **eResults 4.** Exploratory Factor Analysis of BDI Items

Exploratory factor analysis revealed 4 factors for the twenty-two items of the BDI. Factor 1 was comprised of 5 items of the BDI, mostly associated with a negative self-image that explained 4.7% of the variance with factor loadings from .473 to .748. A second factor, mostly associated with 9 items relating to sadness, anhedonia and negative affect explained 40.3% of the variance with factor loadings between .341 and .695. A third factor, comprised of 5 items associated with somatic symptoms and feelings of being punished, explained 5.1% of the variance and showed loadings from .346 to .608. A final factor comprised of the single BDI item measuring pessimism explained another 3.8% of the variance, with a factor loading of .559 (see Figure 1 for an overview).

In a partial Spearman analysis, controlling for sex and grey matter ratio, GABA concentration was significantly and negatively associated with factors 2 ( $\rho = -.110$ ,  $p = .037$ ,  $n = 361$ ) and 3 ( $\rho = -.155$ ,  $p = .003$ ,  $n = 361$ ) identified in the exploratory factor analysis. Glx was not associated with any of the factors. Glu was significantly and negatively associated with factor 3 ( $\rho = -.111$ ,  $p = .036$ ,  $n = 360$ ). Finally, Gln showed a significant positive association with factor 1 ( $\rho = .150$ ,  $p = .021$ ,  $n = 239$ ), see Figure 2 for an overview.

Figure 1. Factor Loadings

| Factor Loadings         |  |              |              |              |   |              |  |  |       |  |
|-------------------------|--|--------------|--------------|--------------|---|--------------|--|--|-------|--|
|                         |  | Factor       |              |              |   |              |  |  |       |  |
|                         |  | 1            | 2            | 3            | 4 | Uniqueness   |  |  |       |  |
| BDI8_SelfCriticism      |  | <b>0.748</b> |              |              |   |              |  |  | 0.387 |  |
| BDI7_SelfDislike        |  | <b>0.719</b> |              |              |   |              |  |  | 0.375 |  |
| BDI3_PastFailure        |  | <b>0.682</b> |              |              |   |              |  |  | 0.331 |  |
| BDI5_Guilt              |  | <b>0.549</b> |              |              |   |              |  |  | 0.496 |  |
| BDI14_Worthlessness     |  | <b>0.473</b> |              |              |   |              |  |  | 0.606 |  |
| BDI12_LossOfInterest    |  |              | <b>0.695</b> |              |   |              |  |  | 0.455 |  |
| BDI4_LossOfPleasure     |  |              | <b>0.650</b> |              |   |              |  |  | 0.410 |  |
| BDI17_Tiredness         |  |              | <b>0.610</b> |              |   |              |  |  | 0.438 |  |
| BDI22_InterestInSex     |  |              | <b>0.580</b> |              |   |              |  |  | 0.618 |  |
| BDI13_Indecisiveness    |  |              | <b>0.501</b> |              |   |              |  |  | 0.486 |  |
| BDI15_EnergyLoss        |  | 0.330        | <b>0.400</b> |              |   |              |  |  | 0.523 |  |
| BDI1_Sadness            |  |              | <b>0.396</b> |              |   | 0.326        |  |  | 0.466 |  |
| BDI10_Crying            |  |              | <b>0.353</b> |              |   |              |  |  | 0.653 |  |
| BDI11_Irritability      |  |              | <b>0.341</b> |              |   |              |  |  | 0.715 |  |
| BDI18_Appetite          |  |              |              | <b>0.608</b> |   |              |  |  | 0.543 |  |
| BDI21_HealthWorry       |  |              |              | <b>0.507</b> |   |              |  |  | 0.666 |  |
| BDI19_WeightLoss        |  |              |              | <b>0.499</b> |   |              |  |  | 0.739 |  |
| BDI6_PunishmentFeelings |  | 0.317        |              | <b>0.479</b> |   |              |  |  | 0.601 |  |
| BDI9_SuicidalThoughts   |  |              |              | <b>0.346</b> |   | 0.310        |  |  | 0.479 |  |
| BDI16_SleepChanges      |  |              |              |              |   |              |  |  | 0.657 |  |
| BDI2_Pessimism          |  |              |              |              |   | <b>0.559</b> |  |  | 0.311 |  |

Note. 'Minimum residual' extraction method was used in combination with a 'oblimin' rotation

Figure 2. Partial Spearman Correlation Analyses

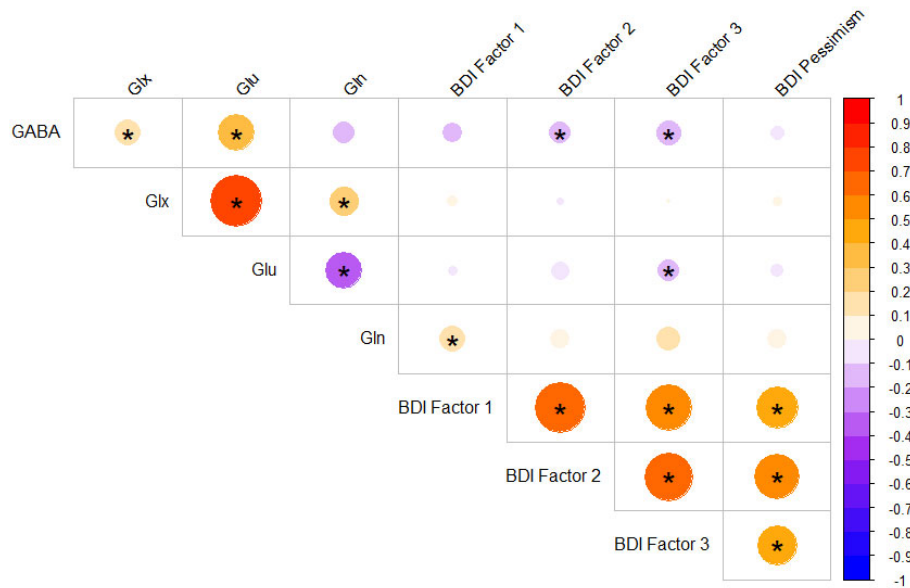

Partial Spearman Correlation Analyses of Left DLPFC Neurotransmitter Concentrations (GABA, Glx, Glu, Gln) and the Factors Identified in the Exploratory Factor Analysis of BDI Items, controlled for sex and grey matter ratio. Note: \*  $p < .05$ , \*\*  $p < .01$ , \*\*\*  $p < .001$ , the Legend Depicts Color-coded Effect Sizes (Spearman's Rho).

**eFigure 1. Female Subgroup Boxplots**

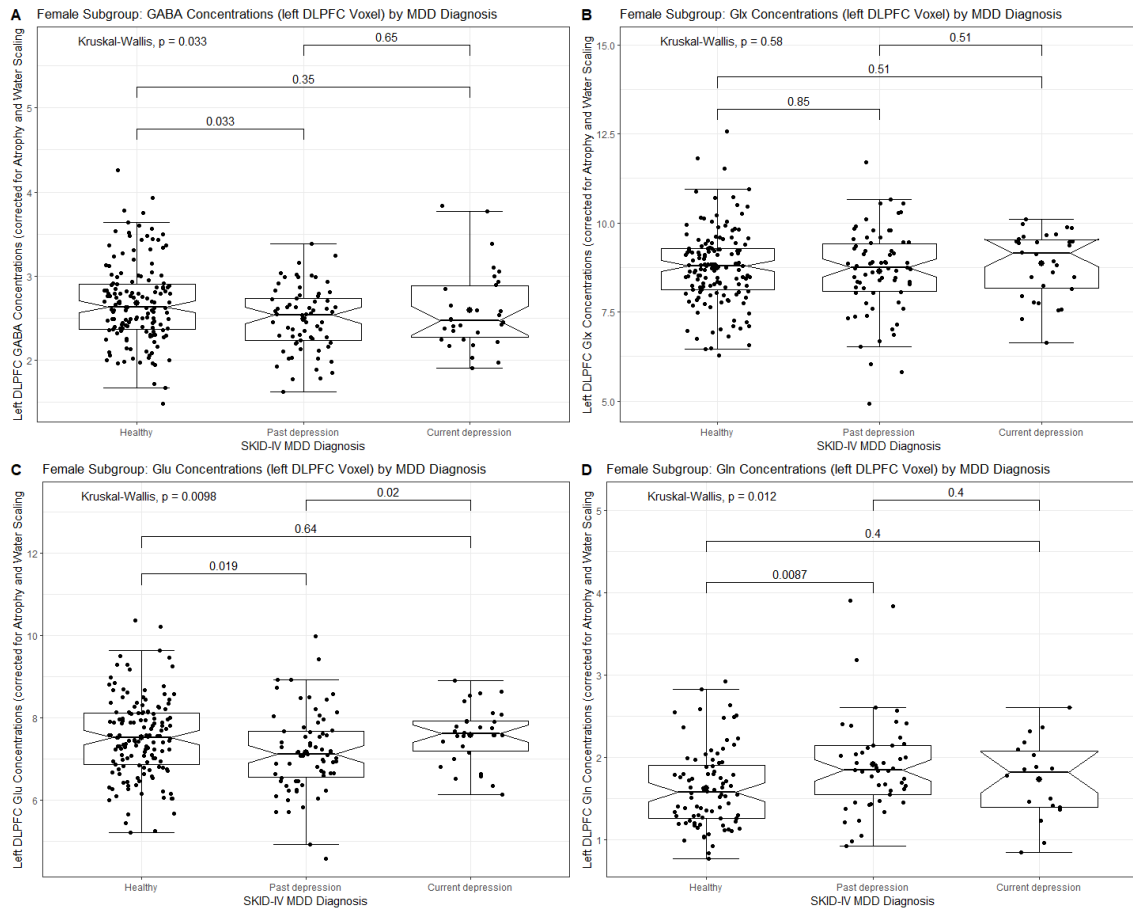

**Female Subgroup.** Boxplots of left DLPFC neurotransmitter concentrations by MDD diagnosis (corrected for false discovery rate). **A)** Kruskal-Wallis chi-squared = 6.7967,  $df = 2$ ,  $p$ -value = 0.03343; **B)** Kruskal-Wallis chi-squared = 1.0877,  $df = 2$ ,  $p$ -value = 0.5805; **C)** Kruskal-Wallis chi-squared = 9.2515,  $df = 2$ ,  $p$ -value = 0.009797; **D)** Kruskal-Wallis chi-squared = 8.8965,  $df = 2$ ,  $p$ -value = 0.0117.



**eFigure 2. Male Subgroup Boxplots**

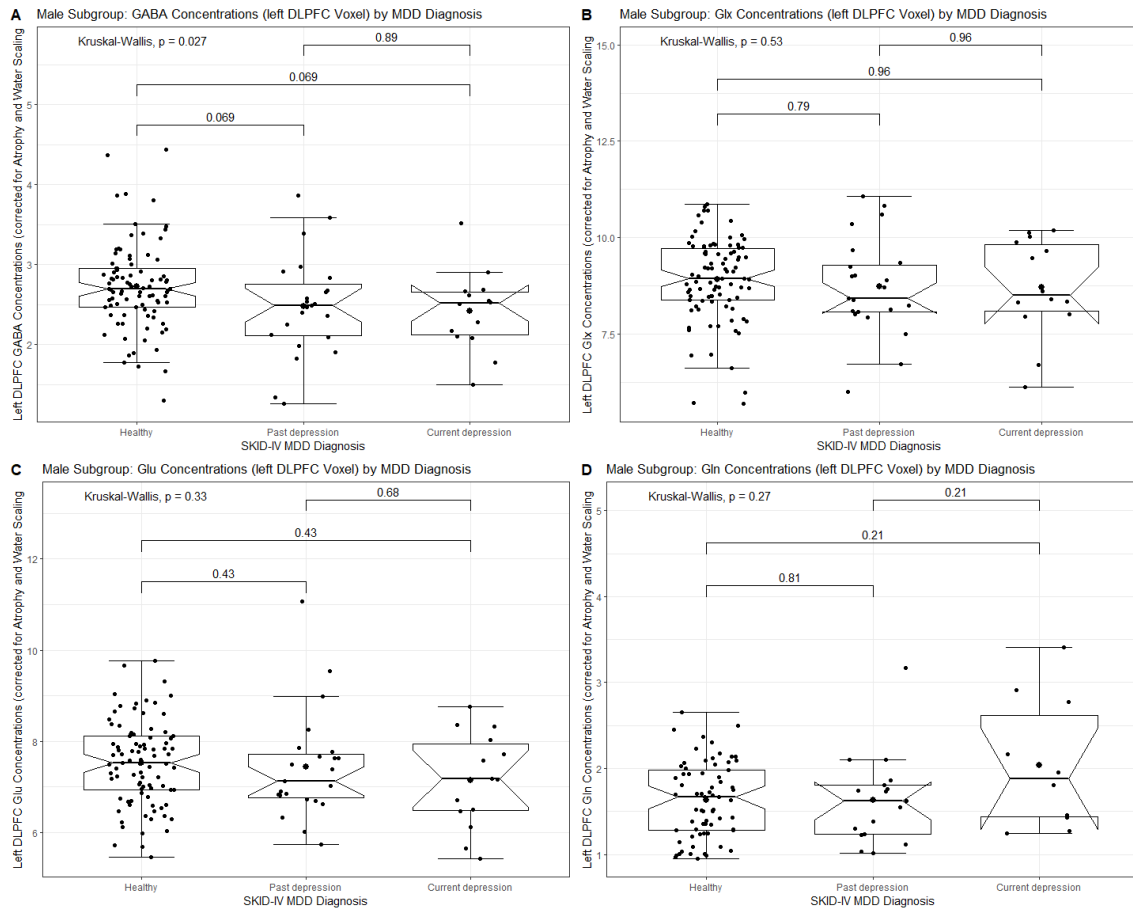

**Male Subgroup.** Boxplots of left DLPFC neurotransmitter concentrations by MDD diagnosis (corrected for false discovery rate). **A)** Kruskal-Wallis chi-squared = 7.2183,  $df = 2$ ,  $p$ -value = 0.02708; **B)** Kruskal-Wallis chi-squared = 1.2595,  $df = 2$ ,  $p$ -value = 0.5327; **C)** Kruskal-Wallis chi-squared = 2.1971,  $df = 2$ ,  $p$ -value = 0.3334; **D)** Kruskal-Wallis chi-squared = 2.6282,  $df = 2$ ,  $p$ -value = 0.2687.

## eReferences.

1. Steinberg M. *Interviewer's guide to the structured clinical interview for DSM-IV dissociative disorders (SCID-D)*. American Psychiatric Pub; 1994.
2. Hamilton M. A rating scale for depression *J Neurol Neurosurg Psychiatry* 23: 56–62. *View Article*. 1960.
3. Montgomery S, Åsberg M. *A new depression scale designed to be sensitive to change*. Acad. Department of Psychiatry, Guy's Hospital; 1977.
4. Beck AT, Ward CH, Mendelson M, Mock J, Erbaugh J. An Inventory for Measuring Depression. *Archives of General Psychiatry*. 1961;4(6):561-571.
5. Chowdhury FA, O'Gorman RL, Nashef L, et al. Investigation of glutamine and GABA levels in patients with idiopathic generalized epilepsy using MEGAPRESS. *J Magn Reson Imaging*. 2015;41(3):694-699.
6. Michels L, Martin E, Klaver P, et al. Frontal GABA levels change during working memory. *PLoS one*. 2012;7(4):e31933-e31933.
